# Supplementary material
Source: PubMed Central journal article supplement (PMC3549298)

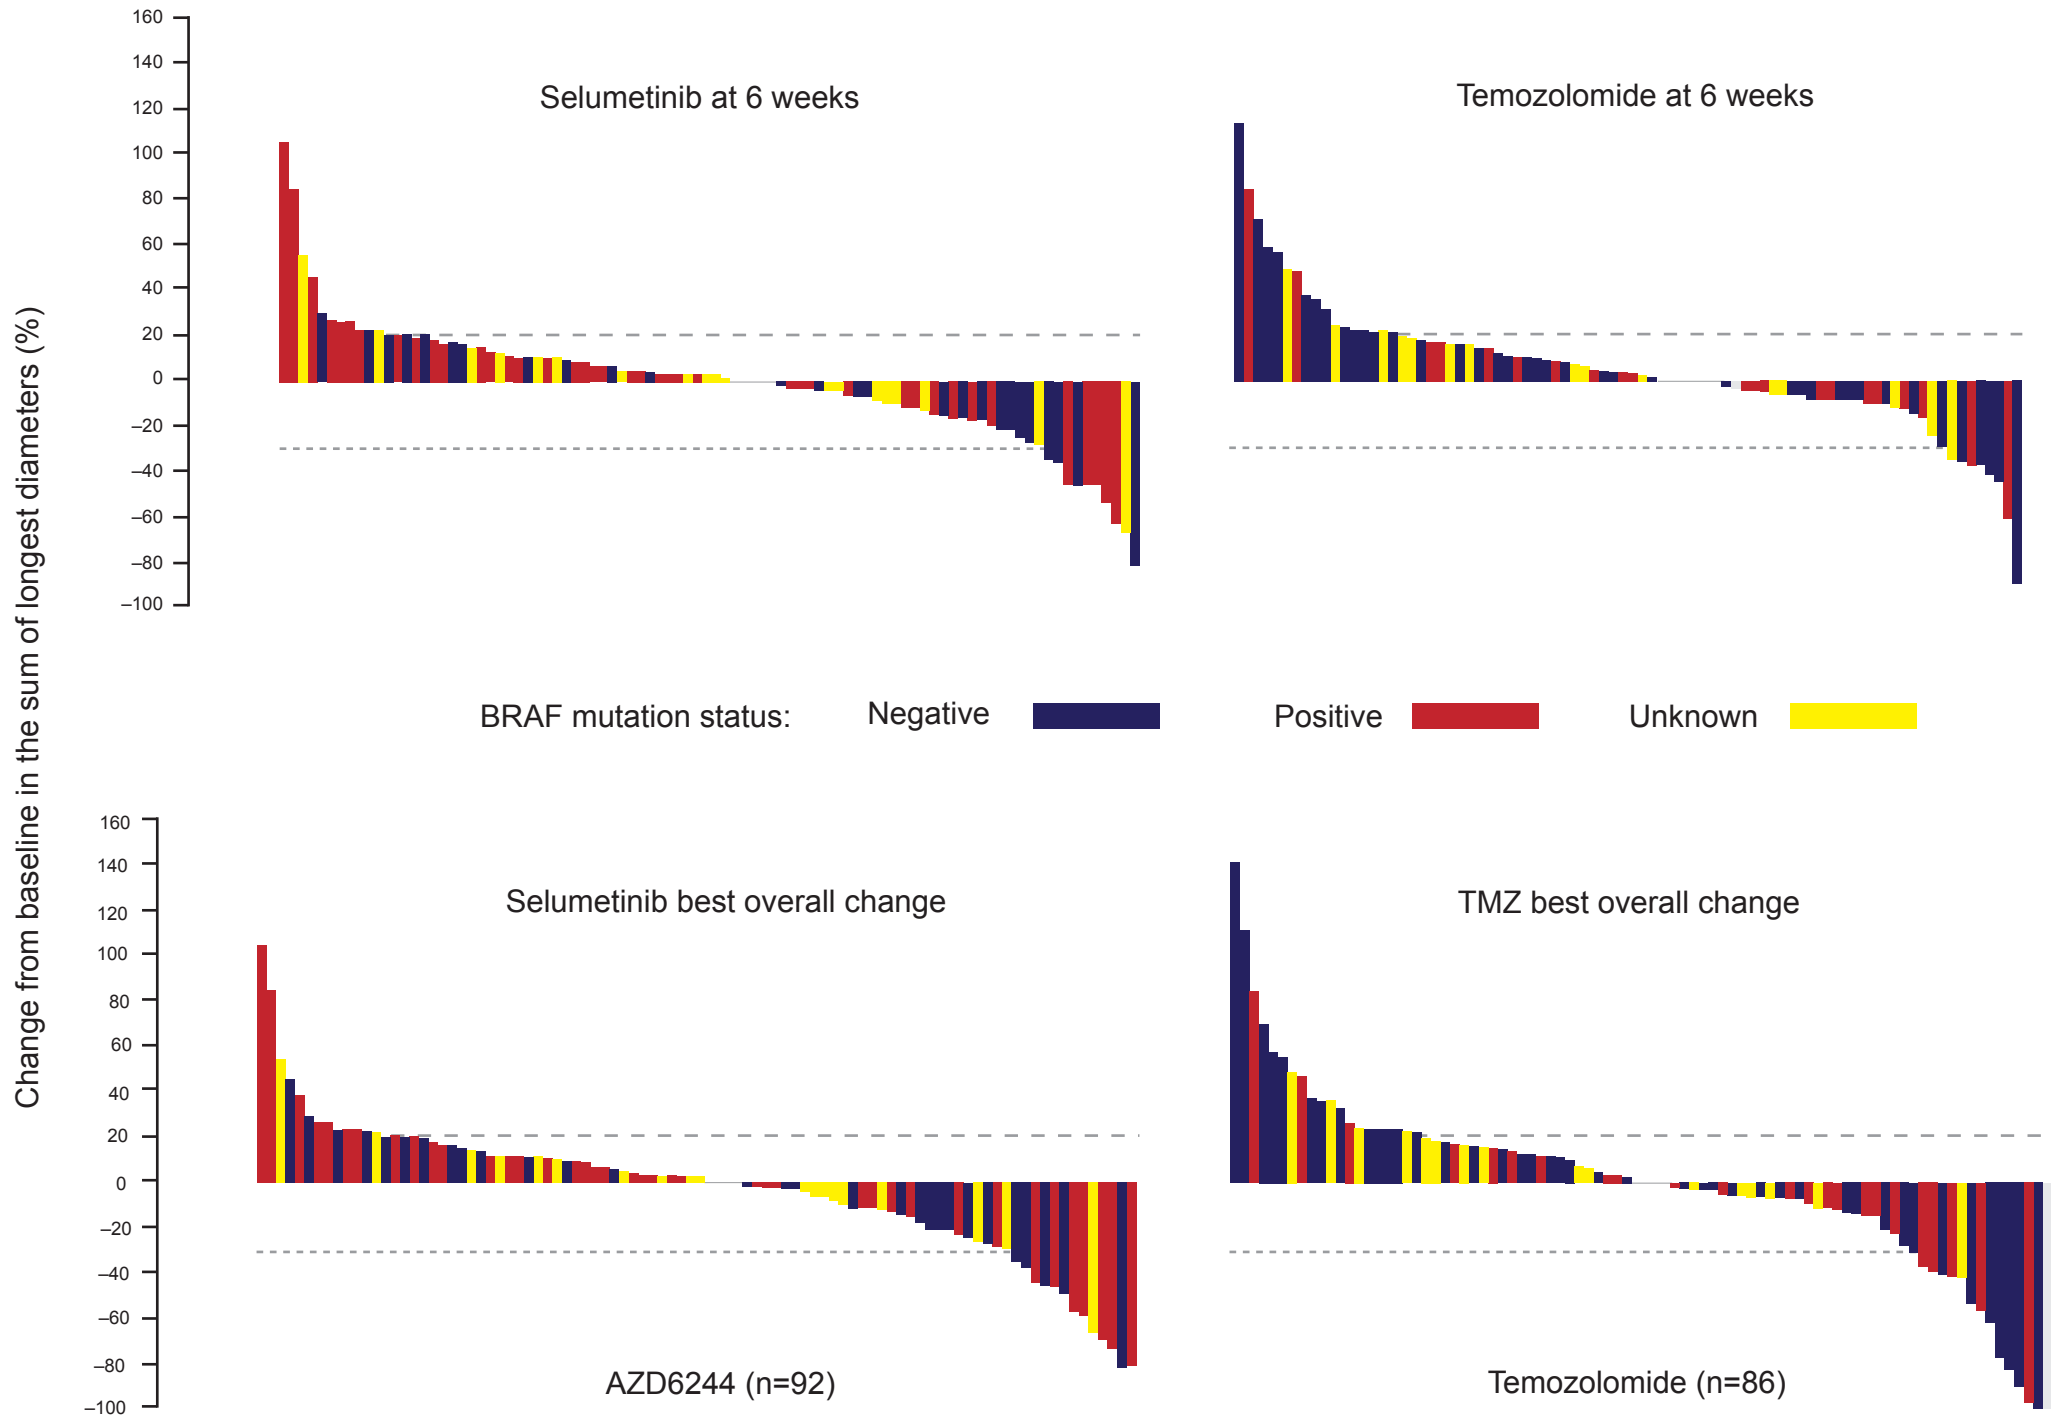

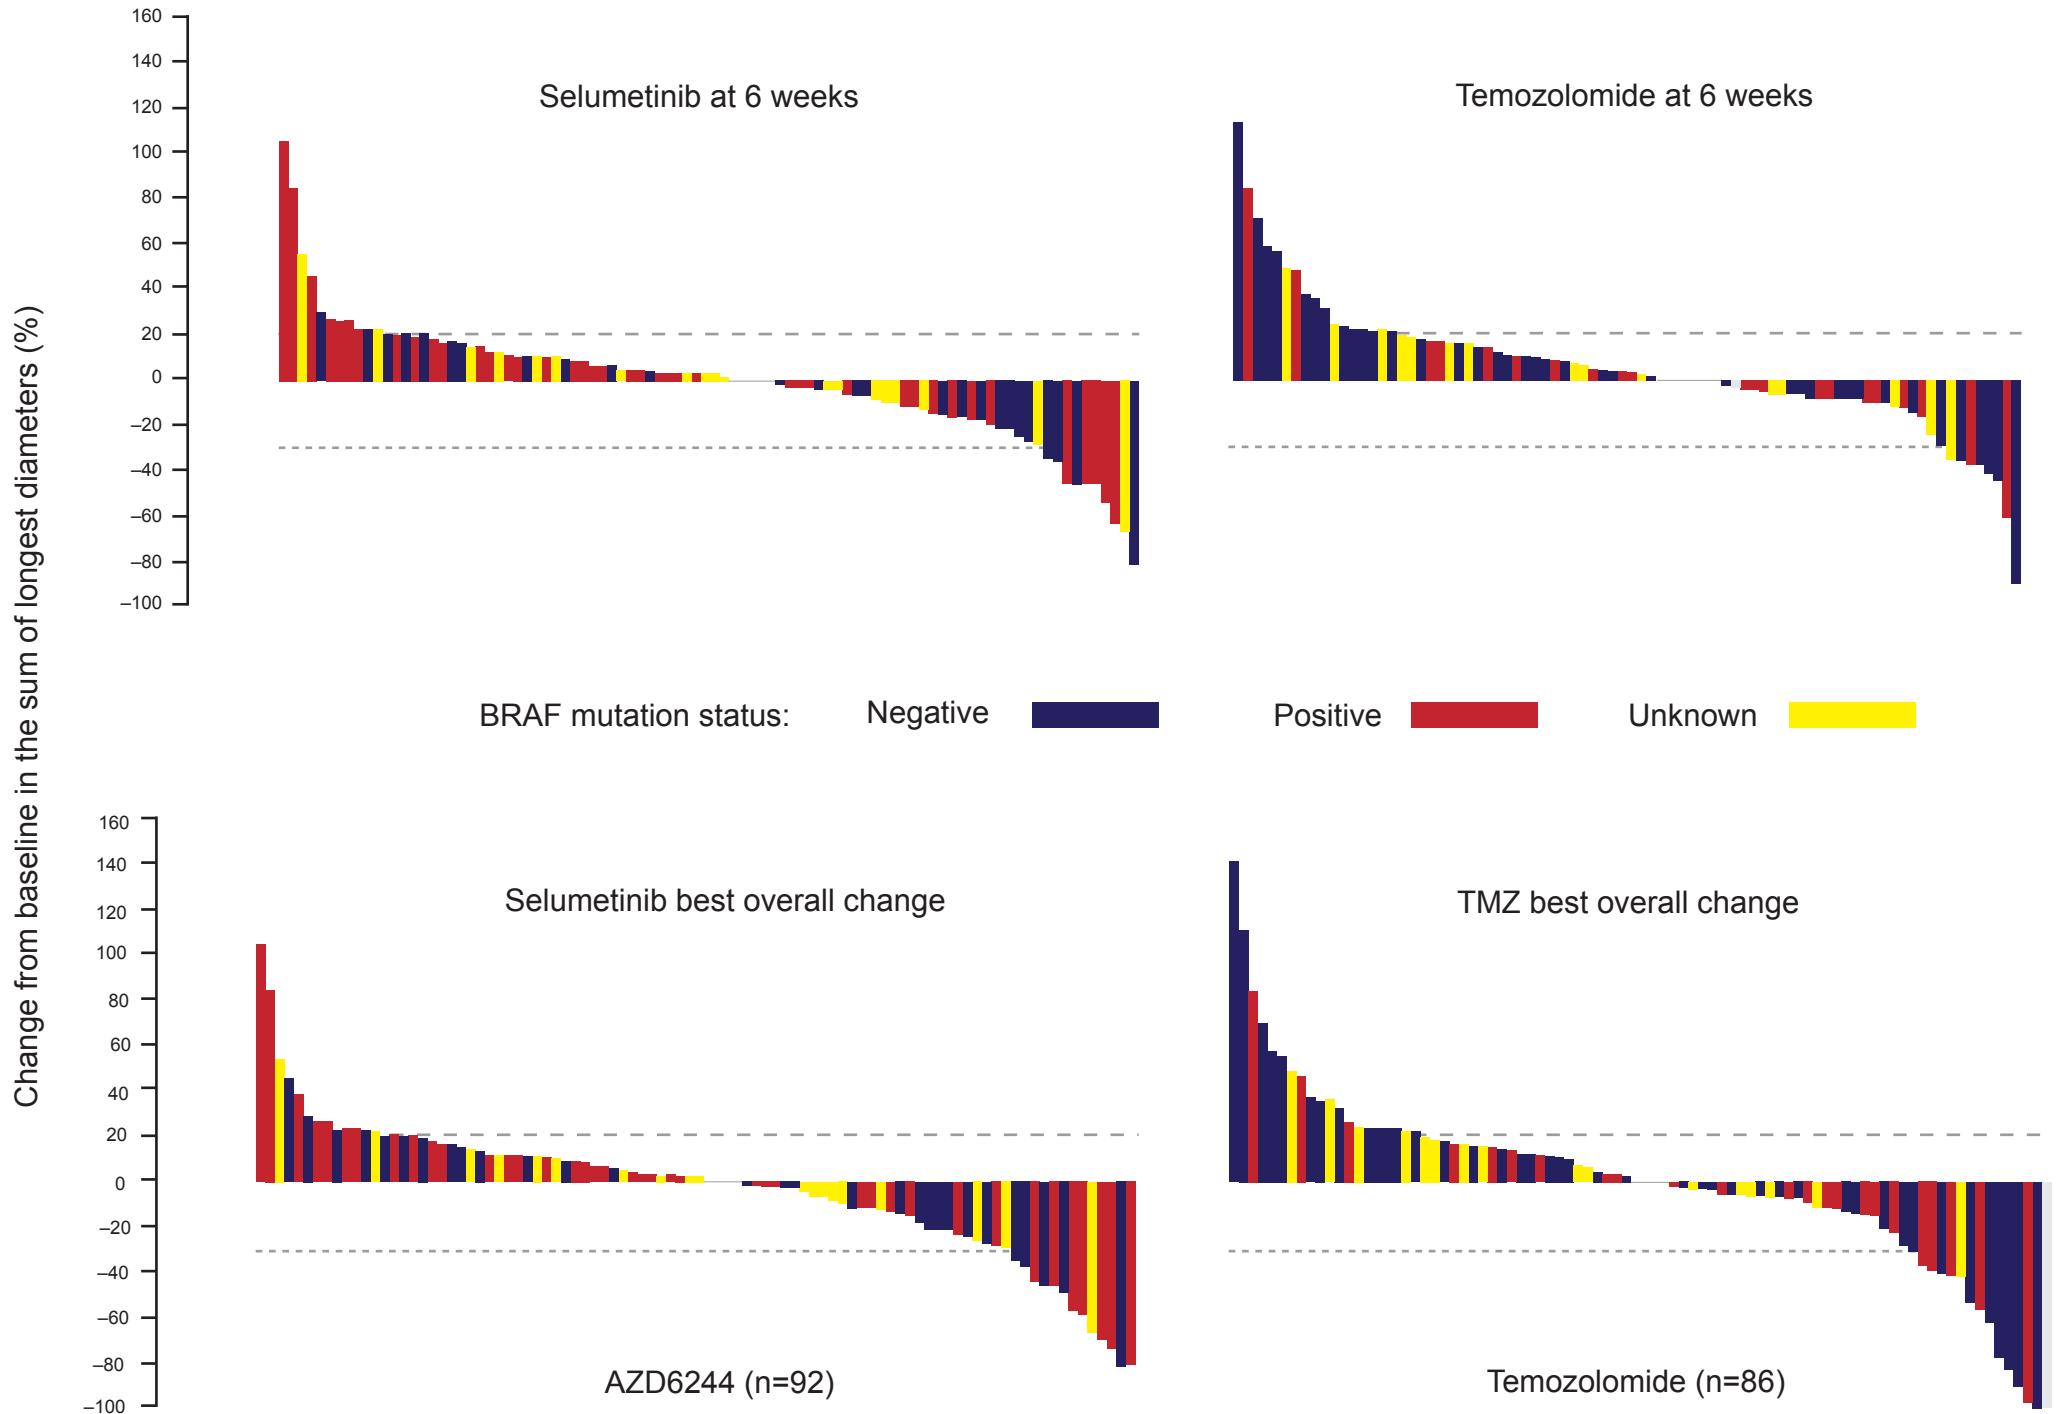

Supplement: NIHMS431914-supplement-suppl.pdf [file NIHMS431914-supplement-suppl.pdf]
